# Supplementary material for: The individuality of shape asymmetries of the human cerebral cortex
Source: eLife. 2022 Oct 5;11:e75056. doi: 10.7554/eLife.75056 (PMC9668337; doi:10.7554/eLife.75056)
Supplement: Supplementary file 1. [file elife-75056-supp1.docx]

| Eigen-group Index | 0 | 1 | 2 | 3 | 4 |
| --- | --- | --- | --- | --- | --- |
| Eigenvalues | 1st | 2nd*–*4th | 5th*–*9th | 10th*–*16th | 17th*–*25th |
| Wavelength (mm) | N/A | 297.673 | 171.862 | 121.525 | 94.133 |
| Eigen-group Index | 5 | 6 | 7 | 8 | 9 |
| Eigenvalues | 26th*–*36th | 37th*–*49th | 50th*–*64th | 65th*–*81st | 82nd*–*100th |
| Wavelength (mm) | 76.859 | 64.958 | 56.255 | 49.612 | 44.374 |
| Eigen-group Index | 10 | 11 | 12 | 13 | 14 |
| Eigenvalues | 101st*–*121st | 122nd*–*144th | 145th*–*169th | 170th*–*196th | 197th*–*225th |
| Wavelength (mm) | 40.138 | 36.641 | 33.705 | 31.205 | 29.050 |
